# Supplementary material for: Metabolic Profiling Analysis of Liver in Landes Geese During the Formation of Fatty Liver via GC-TOF/MS
Source: Front Physiol. 2022 Jan 3;12:783498. doi: 10.3389/fphys.2021.783498 (PMC8761942; doi:10.3389/fphys.2021.783498)
Supplement: Supplementary Table S2 | — The significantly different metabolites in goose liver samples. aThe D7 group compared with the D0 group. bThe D25 group compared with the D0 group. cThe D25 group compared with the D7 group. [file Table_2.xlsx]

## Sheet: D7-D0
	A Peak	Formula	CAS	Similarity	Retention time	Mean D7	Mean D0	VIP	P-value	Fold change	Log_Fold change
	oleic acid	C18H34O2	112-80-1	943	21.0441,0	0.380656	0.107377	1.7133	0.0484447	3.54504	1.8258
	phenylalanine	C9H11NO2	63-91-2	921	15.0365,0	0.328723	0.528971	1.87341	0.00312025	0.621438	-0.686317
	glutamic acid	NA	56-86-0	913	14.9305,0	0.450094	0.71806	1.93898	0.00377319	0.626819	-0.673879
	O-Phosphorylethanolamine	C2H8NO4P	1071-23-4	893	16.752,0	0.0511912	0.107413	2.20805	0.000334256	0.476582	-1.0692
	Lactobionic Acid	NA	96-82-2	859	25.166,0	0.0868272	0.0422065	1.83345	0.00950517	2.0572	1.04068
	Methyl Phosphate	NA	812-00-0	848	9.12509,0	0.429518	0.911052	2.39288	1.19839e-05	0.471452	-1.08482
	trans-4-hydroxy-L-proline	C5H9NO3	51-35-4	847	13.819,0	0.385686	0.769578	1.4784	0.0181656	0.501165	-0.996641
	Myristic Acid	C14H28O2	544-63-8	832	17.4993,0	0.0599116	0.0437969	1.64721	0.0047884	1.36794	0.452006
	ribose	C5H10O5	24259-59-4	821	15.5371,0	0.134003	0.0540835	1.93617	0.00725654	2.4777	1.309
	1-Monopalmitin	NA	542-44-9	798	24.0061,0	0.00415246	0.00203672	1.17663	0.00751262	2.0388	1.02772
	unknown			791	21.0866,0	0.0250494	0.0071474	1.36293	0.0447148	3.50468	1.80928
	maltotriose	C18H32O16	1109-28-0	735	31.9443,0	0.327571	0.1849	1.65529	0.0186527	1.77161	0.825063
	Adenosine 5-monophosphate	NA	18422-05-4	619	27.3285,0	0.00305457	0.00708471	1.6604	0.0295362	0.431149	-1.21374
	sulfuric acid	H2SO4	7664-93-9	603	8.99839,0	0.179903	0.39355	2.32356	0.000467092	0.457129	-1.12933
	5,6-dihydrouracil	C4H6N2O2	504-07-4	566	13.358,0	0.0019788	0.0172479	1.38386	0.018819	0.114727	-3.12372
	5-Dihydrocortisol	NA	516-41-6	559	28.2392,0	0.0275431	0.0188198	1.23025	0.0479146	1.46351	0.549436
	2-Monopalmitin	NA	23470-00-0	535	23.7477,0	0.00524086	0.00187078	1.77709	0.00161002	2.80144	1.48617
	unknown			530	9.5094,0	0.0648751	0.044656	1.13436	0.0162936	1.45278	0.538813
	1,5-Anhydroglucitol	C6H12O5	154-58-5	504	17.5539,0	0.00325877	0.00982062	1.227	0.0185474	0.331829	-1.59149
	3-Hydroxypropionic acid	C3H6O3	503-66-2	503	8.61056,0	0.748023	0.516957	1.72098	0.0372578	1.44697	0.533037
	unknown			481	26.1254,0	0.0135456	0.0231231	1.06701	0.00642358	0.585803	-0.771513
	unknown			447	17.2413,0	0.00067274	0.00614259	2.38692	0.000365307	0.10952	-3.19073
	Cytosin			436	13.8439,0	0.000287221	0.00174202	1.72795	0.0134212	0.164878	-2.60053
	3-Methylamino-1,2-propanediol	NA	40137-22-2	431	11.8804,0	0.0067455	0.0113825	1.23002	0.0275761	0.59262	-0.75482
	unknown			384	14.7907,0	0.0313377	0.0210177	1.00305	0.0313987	1.49101	0.576291
	nornicotine	C9H12N2	5746-86-1	364	14.0853,0	0.00689083	0.00433148	1.06532	0.0395748	1.59087	0.669817
	unknown			352	10.2367,0	0.000829696	0.0025156	1.41339	0.0176584	0.32982	-1.60025
	unknown			344	7.92209,0	0.00581851	4.66267e-06	1.94343	0.00640567	1247.89	10.2853
	unknown			343	9.6757,0	0.0232191	0.0122385	1.38956	0.00240698	1.89721	0.92388
	3-hydroxybenzaldehyde	C7H6O2	100-83-4	342	13.0947,0	0.271725	0.442365	1.8238	0.0159565	0.614256	-0.703089
	2-amino-3-(4-hydroxyphenyl)propanoic acid 2	C9H11NO3	556-03-6	338	17.648,0	0.00538207	4.66267e-06	1.65047	0.0260243	1154.29	10.1728
	unknown			334	8.70375,0	0.00825883	0.00466118	1.4129	0.0144914	1.77183	0.825242
	unknown			332	7.86157,0	0.00030961	0.00250961	2.12381	0.00298866	0.12337	-3.01894
	unknown			332	27.5159,0	0.0118153	0.00444328	1.09223	0.00499265	2.65913	1.41095
	inosine 5'-monophosphate	C10H13N4O8P	131-99-7	331	26.8817,0	0.000339762	0.00110805	1.35993	0.0325575	0.306629	-1.70543
	unknown			325	23.3672,0	0.0272645	0.0131968	1.07585	0.0401261	2.06599	1.04684
	unknown			324	9.17067,0	0.00305356	0.00926324	1.48591	0.00678248	0.329643	-1.60103
	unknown			321	9.0919,0	0.0485636	0.0349163	1.64474	0.0443475	1.39085	0.475972
	Lactamide 2	NA	2043-43-8	306	8.39643,0	0.00325706	0.00835463	1.68433	0.000309018	0.389851	-1.35901
	unknown			305	10.7227,0	0.0180872	0.0108097	1.23992	0.015209	1.67324	0.742644
	2-Deoxyuridine	C9H12N2O5	951-78-0	304	10.6024,0	0.132274	0.0698768	1.05538	0.0318316	1.89296	0.920643
	unknown			303	25.718,0	0.00578036	0.0143279	1.51183	0.0280732	0.403434	-1.30959
	2-amino-2-methylpropane-1,3-diol	C4H11NO2	115-69-5	299	11.1374,0	0.0175763	0.0133032	1.61026	0.0221715	1.32121	0.401858
	glutathione - H2O	C10H17N3O6S	70-18-8	297	24.091,0	0.00318816	0.00145818	1.5081	0.0141302	2.18639	1.12855
	Dihydroxyacetone	C3H6O3	62147-49-3	287	10.1671,0	0.0899239	0.0641202	1.69448	0.0353184	1.40243	0.487926
	unknown			287	12.5128,0	0.00457803	0.00152872	1.58879	0.0482016	2.99467	1.5824
	unknown			284	11.3687,0	0.0347065	0.0177109	1.13667	0.0435813	1.95961	0.970566
	unknown			277	7.98421,0	0.0104854	0.00690527	1.76259	0.0170251	1.51846	0.602611
	Thymol	C10H14O	89-83-8	272	11.1782,0	0.00594082	0.00490765	1.45777	0.0438534	1.21052	0.27563
	unknown			266	16.0285,0	0.126406	0.087215	1.9095	0.00930004	1.44936	0.535416
	unknown			260	8.81158,0	0.00412499	0.00220573	1.2084	0.00288763	1.87012	0.903134
	unknown			257	9.83877,0	0.003838	0.00249583	1.26955	0.0161412	1.53777	0.620838
	unknown			254	9.71423,0	0.00305745	0.00432219	1.10687	0.0206767	0.707385	-0.499433
	unknown			250	9.20604,0	0.00426408	0.002068	1.29551	0.0087185	2.06193	1.044
	unknown			248	14.6055,0	0.00637744	0.00364049	1.10954	0.0433599	1.75181	0.808846
	unknown			238	8.28865,0	0.0448117	0.0338117	1.7489	0.0154361	1.32533	0.406353
	unknown			237	8.0727,0	0.0882192	0.039512	1.64608	0.00203084	2.23272	1.1588
	unknown			221	17.6869,0	0.139364	0.0820286	1.46536	0.0144126	1.69897	0.764659
	unknown			215	11.9604,0	0.000374192	0.00154099	1.05947	0.0216981	0.242825	-2.04201
	unknown			209	9.01568,0	0.00566659	0.00391585	1.87865	0.0292649	1.44709	0.533157
	unknown			209	9.3759,0	0.0157497	0.0109362	1.15893	0.01714	1.44014	0.526207
	unknown			203	9.47193,0	0.0197731	0.0135952	1.1706	0.0208338	1.45442	0.540443
	unknown			198	11.0407,0	0.0122267	0.00735694	1.24246	0.0141605	1.66193	0.732858
	unknown			186	9.17752,0	0.00377073	0.00246993	1.25953	0.0263645	1.52666	0.610377
	unknown			181	7.57163,0	0.00136498	0.00437425	1.1393	0.0297516	0.312048	-1.68016
	unknown			178	8.02591,0	0.0267412	0.0139608	1.49185	0.00757855	1.91544	0.937675
	unknown			87	18.0672,0	0.00365798	0.0142161	1.43026	0.00694183	0.257311	-1.95841
	unknown			80	7.2157,0	0.00762718	0.00476465	1.27417	0.0359985	1.60078	0.678779
	unknown			0	6.63971,0	0.00528608	0.00331129	1.28738	0.0338431	1.59638	0.674804
	unknown			0	6.67562,0	0.0208619	0.0145994	1.16614	0.0411229	1.42896	0.514967
	unknown			0	6.74749,0	0.0150855	0.00931101	1.2608	0.0120783	1.62018	0.696155
	unknown			0	6.93969,0	0.07513	0.0455436	1.21676	0.011773	1.64963	0.72214
	unknown			0	7.1919,0	0.0327975	0.0222933	1.16459	0.0417932	1.47118	0.556978
	unknown			0	7.24884,0	0.00889212	0.00592367	1.18156	0.037092	1.50112	0.586037
	unknown			0	7.41467,0	0.270798	0.190612	1.09281	0.0437009	1.42068	0.506577
	unknown			0	7.7692,0	0.034046	0.021964	1.65615	0.043076	1.55008	0.632346
	unknown			0	7.82954,0	0.0209255	0.0134363	1.76084	0.0165618	1.55738	0.639125
	unknown			0	7.87207,0	0.0104858	0.00686014	1.8765	0.00455098	1.52851	0.612121
	unknown			0	8.50219,0	0.152145	0.109751	1.72788	0.0393304	1.38627	0.47121
	unknown			0	9.27043,0	0.0424739	0.0589665	1.92253	0.00975282	0.720305	-0.47332
	unknown			0	13.5499,0	0.0335214	0.0479464	1.83916	0.0065223	0.699143	-0.516341
	unknown			0	22.1528,0	0.121602	0.0624398	1.18775	0.0225799	1.94751	0.961631

## Sheet: D25-D0
	B Peak	Formula	CAS	Similarity	Retention time	Mean D25	Mean D7	VIP	P-value	Fold change	Log_Fold change
	valine	C5H11NO2	72-18-4	952	9.6787,0	0.723433	1.66647	2.13128	0.00124371	0.434111	-1.20386
	palmitic acid	C16H32O2	21096	947	19.4768,0	1.74823	0.241787	1.94449	0.00236495	7.23044	2.85408
	oleic acid	C18H34O2	112-80-1	943	21.0441,0	1.2786	0.107377	2.18635	0.000375483	11.9076	3.57381
	Isoleucine	C6H13NO2	73-32-5	934	10.7752,0	0.308288	0.532308	2.20554	2.29198e-07	0.579154	-0.787981
	serine	C3H7NO3	56-45-1	931	11.6808,0	1.63031	3.12446	2.09433	2.17684e-06	0.52179	-0.938458
	phenylalanine	C9H11NO2	63-91-2	921	15.0365,0	0.155945	0.528971	2.34484	1.25203e-05	0.294808	-1.76215
	oxoproline	NA	98-79-3	918	13.8272,0	8.75944	12.4327	1.84006	0.000231742	0.704546	-0.505233
	uracil	C4H4N2O2	66-22-8	915	11.3828,0	0.0792089	0.140339	1.72648	0.00148353	0.564411	-0.825183
	glutamic acid	NA	56-86-0	913	14.9305,0	0.370042	0.71806	2.05831	2.80764e-05	0.515336	-0.956416
	stearic acid	C18H36O2	21128	913	21.2662,0	1.17117	0.342842	1.74672	0.00293886	3.41606	1.77234
	O-Phosphorylethanolamine	C2H8NO4P	1071-23-4	893	16.752,0	0.0389643	0.107413	2.07313	9.41403e-05	0.362751	-1.46295
	xylitol	C5H12O5	87-99-0	883	15.8572,0	0.0277566	0.102918	2.24292	0.000408199	0.269695	-1.8906
	Methyl Phosphate	NA	812-00-0	848	9.12509,0	0.251634	0.911052	2.33466	2.99581e-06	0.276201	-1.85621
	trans-4-hydroxy-L-proline	C5H9NO3	51-35-4	847	13.819,0	0.27232	0.769578	2.25365	0.000751884	0.353856	-1.49877
	Aminomalonic acid	C3H5NO4	1068-84-4	846	13.1027,0	0.0824148	0.185611	2.06402	0.000129308	0.44402	-1.1713
	L-cysteine	C3H7NO2S	52-90-4	828	14.1683,0	0.139622	0.230864	1.73714	0.00437616	0.604783	-0.72551
	glycerol	C3H8O3	56-81-5	825	10.5117,0	1.07103	1.77538	1.83574	0.00075695	0.603269	-0.729126
	phosphate	H3PO4	7664-38-2	817	10.5271,0	0.000403973	0.00376258	1.41178	0.0170185	0.107366	-3.21939
	glycine	C2H5NO2	56-40-6	812	8.34715,0	0.400917	0.783952	1.46675	0.00884585	0.511405	-0.967462
	D-Glyceric acid	C3H6O4	6000-40-4	805	11.2452,0	0.010973	0.0154386	1.24849	0.0364288	0.71075	-0.492585
	squalene	C30H50	111-02-4	792	25.7425,0	2.26235	0.0173344	1.21859	0.00154616	130.512	7.02804
	unknown			779	10.2871,0	0.0149053	0.0489502	2.16452	0.000635608	0.304499	-1.71549
	unknown			765	9.35094,0	0.00890396	0.0305058	1.81354	0.00546267	0.291878	-1.77656
	6-phosphogluconic acid	C6H13O10P	53411-70-4	702	22.6002,0	0.113715	0.0659811	1.34116	0.0297696	1.72344	0.785293
	Fructose 2,6-biphosphate degr prod	C6H14O12P2	79082-92-1	670	20.9231,0	3.11771	1.06954	1.85623	0.000123424	2.91501	1.5435
	conduritol b epoxide	NA	6090-95-5	664	18.5264,0	0.0331278	0.0556103	1.2886	0.0487444	0.595712	-0.747312
	Zymosterol	C27H44O	128-33-6	656	28.9634,0	0.00356637	0.0321561	1.58512	0.00305748	0.110908	-3.17256
	pantothenic acid	C9H17NO5	79-83-4	630	18.8873,0	0.00486273	0.00152323	1.1881	0.0263466	3.19237	1.67463
	sulfuric acid	H2SO4	7664-93-9	603	8.99839,0	0.114905	0.39355	2.27411	0.000108161	0.291971	-1.7761
	1-Aminocyclopropanecarboxylic acid	NA	22059-21-8	566	9.58619,0	0.000722146	0.00958373	2.14835	9.38967e-06	0.0753512	-3.73023
	5,6-dihydrouracil	C4H6N2O2	504-07-4	566	13.358,0	0.000203195	0.0172479	1.6689	0.0106031	0.0117809	-6.40741
	5-Dihydrocortisol	NA	516-41-6	559	28.2392,0	0.0317533	0.0188198	1.12089	0.04053	1.68723	0.754655
	unknown			541	16.6944,0	3.58947e-06	0.00338745	1.51918	0.0261538	0.00105964	-9.88221
	unknown			536	9.73702,0	0.00171302	0.0091484	1.51799	0.000108628	0.187248	-2.41698
	2-Monopalmitin	NA	23470-00-0	535	23.7477,0	0.00439413	0.00187078	1.51282	0.0163561	2.34883	1.23194
	norvaline	NA	6600-40-4	531	10.0163,0	0.0614759	0.148415	2.02162	0.000613018	0.414216	-1.27154
	unknown			530	25.6647,0	3.58947e-06	0.00135544	1.87631	0.0024946	0.00264819	-8.56078
	unknown			516	20.9701,0	0.0287801	0.0119234	1.23807	0.00592799	2.41374	1.27127
	unknown			510	10.4779,0	1.34935	3.20301	2.22542	0.000283207	0.421276	-1.24716
	cholesterol	C27H46O	57-88-5	490	28.6064,0	0.00314134	2.38139e-05	2.09849	0.000119919	131.912	7.04343
	unknown			481	26.1254,0	0.00719575	0.0231231	1.39003	0.000145443	0.311193	-1.68412
	5'-methylthioadenosine	C11H15N5O3S	2457-80-9	471	25.5051,0	0.00193878	0.000784757	1.50105	0.00987526	2.47055	1.30483
	Erythrose	NA	583-50-6	464	12.8805,0	0.00876557	0.0134972	1.43085	0.0206004	0.649436	-0.62274
	unknown			447	17.2413,0	3.58947e-06	0.00614259	2.45952	0.000204052	0.000584358	-10.7409
	Phenylphosphoric acid	C6H7O4P	701-64-4	437	14.7145,0	0.119621	0.173578	1.62724	0.00175399	0.689147	-0.537115
	Cytosin			436	13.8439,0	0.000304542	0.00174202	1.21324	0.0115477	0.174822	-2.51605
	unknown			435	8.68164,0	0.0237175	0.0322896	1.55901	0.00339149	0.734523	-0.44512
	unknown			435	20.7664,0	0.00643828	0.00176753	1.36635	0.0078906	3.64252	1.86494
	3-Methylamino-1,2-propanediol	NA	40137-22-2	431	11.8804,0	0.00459735	0.0113825	1.93486	0.00136923	0.403896	-1.30794
	Neohesperidin	C28H34O15	13241-33-3	429	23.1556,0	0.0003719	0.0176816	1.4072	0.0449963	0.0210331	-5.57119
	cis-gondoic acid	NA	5561-99-9	405	22.7133,0	0.244111	0.089997	1.70062	0.000933445	2.71244	1.43959
	unknown			383	13.0101,0	0.00197421	0.00355689	1.0295	0.022352	0.555038	-0.849343
	unknown			383	16.4074,0	0.0426358	0.0791529	1.93661	0.000133434	0.538651	-0.892576
	Atropine	C17H23NO3	51-55-8	377	21.6818,0	0.0224624	0.00644359	1.90212	0.000368879	3.486	1.80157
	unknown			359	9.55285,0	0.0247248	0.034576	1.32546	0.0256794	0.715087	-0.48381
	unknown			355	22.8035,0	0.0358074	0.0137613	1.61707	0.00241725	2.60204	1.37964
	2-ketoadipate	NA	689-31-6	354	10.121,0	0.0125425	0.0174517	1.33696	0.0290125	0.718694	-0.47655
	DL-dihydrosphingosine	NA	13552-09-5	353	22.9169,0	0.12023	0.0539932	1.51824	0.00750162	2.22676	1.15494
	unknown			344	7.92209,0	0.00376369	4.66267e-06	2.44161	0.000547735	807.197	9.65678
	3-hydroxybenzaldehyde	C7H6O2	100-83-4	342	13.0947,0	0.120275	0.442365	2.23036	0.000273117	0.271892	-1.8789
	2-ketobutyric acid	C4H6O3	600-18-0	341	7.89251,0	3.58947e-06	0.00522023	2.24172	6.44752e-05	0.000687608	-10.5061
	unknown			341	12.2961,0	0.0237274	0.0373409	1.71576	0.000650612	0.635427	-0.654201
	Allylmalonic acid	NA	2583-25-7	338	11.2907,0	0.00438698	0.00742613	2.13974	2.24082e-06	0.59075	-0.759381
	unknown			332	7.86157,0	0.00011746	0.00250961	1.87584	0.00209307	0.0468042	-4.41722
	inosine 5'-monophosphate	C10H13N4O8P	131-99-7	331	26.8817,0	3.58947e-06	0.00110805	1.91579	0.00329821	0.00323943	-8.27004
	unknown			329	21.2498,0	0.266087	0.0583505	1.61661	0.00213562	4.56015	2.18908
	unknown			328	24.2746,0	0.0122627	0.00413912	1.48617	0.00062062	2.96265	1.56689
	unknown			325	23.3672,0	0.0534911	0.0131968	1.29479	2.74768e-05	4.05335	2.01911
	unknown			324	9.17067,0	0.00215859	0.00926324	1.16968	0.00105893	0.233028	-2.10143
	unknown			321	9.0919,0	0.025131	0.0349163	1.33898	0.0251122	0.719749	-0.474435
	unknown			316	24.4584,0	0.00177177	0.000272457	1.72926	0.00159269	6.50294	2.70109
	unknown			311	21.1886,0	0.0216668	0.00661402	1.91907	0.000539045	3.27589	1.71189
	unknown			309	22.063,0	0.00486262	0.00185564	1.24719	0.0263645	2.62045	1.38981
	Lactamide	NA	2043-43-8	306	8.39643,0	0.000801819	0.00835463	1.87462	6.18228e-10	0.0959729	-3.38123
	unknown			300	9.91098,0	0.00501181	0.00727256	1.55638	0.0045087	0.68914	-0.537131
	2-amino-2-methylpropane-1,3-diol	C4H11NO2	115-69-5	299	11.1374,0	0.00933934	0.0133032	1.51386	0.00659994	0.702037	-0.510382
	unknown			292	22.9601,0	0.00254191	0.000419751	1.79008	0.00185387	6.05574	2.5983
	Thymol	C10H14O	89-83-8	272	11.1782,0	0.00326382	0.00490765	1.72176	0.00070809	0.665047	-0.588472
	unknown			266	16.0285,0	0.114514	0.087215	1.24572	0.0217985	1.31301	0.392879
	9-Fluorenone	C13H8O	486-25-9	255	18.6082,0	0.00511888	0.0117855	1.28754	0.0152041	0.434337	-1.20311
	unknown			254	9.71423,0	0.00255806	0.00432219	1.93778	0.000115256	0.591843	-0.756713
	unknown			241	20.5652,0	0.0216309	0.00843345	1.28846	0.0200537	2.5649	1.3589
	unknown			215	11.9604,0	0.000215825	0.00154099	1.2248	0.00963553	0.140056	-2.83593
	unknown			209	9.01568,0	0.0022685	0.00391585	1.00189	0.00673658	0.579312	-0.787586
	unknown			205	20.541,0	0.00168994	4.66267e-06	2.13963	0.000609623	362.44	8.5016
	unknown			203	12.1542,0	0.00101648	0.00243878	1.13021	4.15032e-05	0.4168	-1.26257
	3-Hydroxypalmitic acid	NA	928-17-6	201	20.9903,0	0.00777597	0.00251922	1.30183	0.000346861	3.08666	1.62605
	unknown			195	11.4812,0	0.0196657	0.0279902	1.56567	0.00654879	0.702593	-0.50924
	unknown			164	22.4716,0	0.00591609	0.00258769	1.52779	0.0393509	2.28624	1.19298
	unknown			87	18.0672,0	3.58947e-06	0.0142161	2.2448	0.00108391	0.000252492	-11.9515
	unknown			0	6.82701,0	0.0240058	0.0727417	2.23243	0.000122737	0.330014	-1.5994
	unknown			0	7.84311,0	0.00305842	0.0114612	1.23566	0.00114566	0.266849	-1.9059
	unknown			0	9.27043,0	0.0194757	0.0589665	2.28439	1.25258e-05	0.330283	-1.59822
	unknown			0	13.5499,0	0.0150341	0.0479464	2.30972	8.97446e-06	0.313561	-1.67318
	unknown			0	34.7445,0	0.000510656	0.0195187	1.87966	0.00826361	0.0261625	-5.25636

## Sheet: D25-D7
	C Peak	Formula	CAS	Similarity	Retention time	Mean D25	Mean D0	VIP	P-value	Fold change	Log_Fold change
	3-hydroxybutyric acid	NA	306-31-0	963	8.88267,0	0.206378	0.626129	1.62276	0.0186583	0.329609	-1.60117
	glycine	C2H5NO2	56-40-6	959	10.9627,0	0.64144	1.37283	1.93858	3.13106e-05	0.467241	-1.09776
	valine	C5H11NO2	72-18-4	952	9.6787,0	0.723433	1.17702	1.55988	0.00809957	0.614628	-0.702214
	palmitic acid	C16H32O2	21096	947	19.4768,0	1.74823	0.651643	1.37067	0.0454814	2.6828	1.42374
	succinic acid	C4H6O4	110-15-6	946	11.0805,0	1.24883	2.39691	1.3037	0.0128471	0.521016	-0.9406
	oleic acid	C18H34O2	112-80-1	943	21.0441,0	1.2786	0.380656	1.59168	0.00177269	3.35893	1.748
	Isoleucine	C6H13NO2	73-32-5	934	10.7752,0	0.308288	0.465598	1.36974	0.0158393	0.662134	-0.594805
	inosine	C10H12N4O5	58-63-9	929	23.885,0	0.0884952	0.182603	1.30297	0.0128184	0.484631	-1.04504
	phenylalanine	C9H11NO2	63-91-2	921	15.0365,0	0.155945	0.328723	1.82188	0.0013269	0.474396	-1.07584
	uracil	C4H4N2O2	66-22-8	915	11.3828,0	0.0792089	0.114219	1.33035	0.00931616	0.693482	-0.52807
	taurine	C2H7NO3S	107-35-7	910	15.5083,0	0.121197	0.418792	1.86529	1.19874e-05	0.289397	-1.78888
	2-hydroxypyridine	C5H5NO	142-08-5	903	7.15275,0	0.328346	0.591188	1.75945	5.29858e-05	0.5554	-0.848401
	Ethanolamine	C2H7NO	141-43-5	900	10.3959,0	0.121915	0.203462	1.61338	0.0025927	0.599205	-0.738879
	aspartic acid	C4H7NO4	56-84-8	890	13.7504,0	0.0711778	0.376838	1.79284	0.00195706	0.188881	-2.40445
	xylitol	C5H12O5	87-99-0	883	15.8572,0	0.0277566	0.084478	2.11958	1.61487e-06	0.328567	-1.60574
	hypoxanthine	C5H4N4O	68-94-0	882	17.0517,0	0.11902	0.328584	1.73832	0.000134151	0.362222	-1.46505
	lactic acid	C3H6O3	50-21-5	881	7.47726,0	13.9771	19.0982	1.459	0.00324537	0.731856	-0.450367
	Lactobionic Acid	NA	96-82-2	859	25.166,0	0.0486562	0.0868272	1.21747	0.013176	0.56038	-0.835524
	fumaric acid	C4H4O4	110-17-8	854	11.5686,0	0.0173047	0.106569	1.98143	0.000536774	0.16238	-2.62255
	glycolic acid	C2H4O3	79-14-1	850	7.67713,0	0.0135556	0.0329527	1.61703	0.00067089	0.411365	-1.28151
	Methyl Phosphate	NA	812-00-0	848	9.12509,0	0.251634	0.429518	1.52287	0.00172471	0.585852	-0.771392
	Aminomalonic acid	C3H5NO4	1068-84-4	846	13.1027,0	0.0824148	0.167688	1.97799	2.3651e-06	0.491478	-1.0248
	beta-Alanine	C3H7NO2	107-95-9	842	12.5804,0	0.0364015	0.14589	1.95385	1.86529e-08	0.249513	-2.00281
	L-Malic acid	C4H6O5	97-67-6	838	13.3284,0	0.0598128	1.22606	2.10133	7.55558e-05	0.0487844	-4.35744
	lysine	C6H14N2O2	56-87-1	836	18.2439,0	0.0783928	0.040998	1.21404	0.0154327	1.91212	0.93517
	L-cysteine	C3H7NO2S	52-90-4	828	14.1683,0	0.139622	0.261516	1.81872	0.000926786	0.533896	-0.905369
	sorbitol	C6H14O6	50-70-4	827	18.3154,0	0.00142813	0.00816943	1.34174	0.000236477	0.174814	-2.51611
	glycerol	C3H8O3	56-81-5	825	10.5117,0	1.07103	2.14239	1.7587	0.000527013	0.499925	-1.00022
	ribose	C5H10O5	24259-59-4	821	15.5371,0	0.0656531	0.134003	1.77956	1.64238e-06	0.489938	-1.02933
	glycine	C2H5NO2	56-40-6	812	8.34715,0	0.400917	0.766343	1.28909	0.00757203	0.523156	-0.934688
	D-Glyceric acid	C3H6O4	6000-40-4	805	11.2452,0	0.010973	0.0150883	1.16067	0.0147438	0.727253	-0.459471
	pyrophosphate	H4P2O7	206975	766	15.3676,0	0.012013	0.0253406	1.84554	0.000450945	0.474061	-1.07686
	unknown			765	9.35094,0	0.00890396	0.0362121	1.66224	0.00245379	0.245884	-2.02395
	maltotriose	C18H32O16	1109-28-0	735	31.9443,0	0.131228	0.327571	1.73726	0.000630858	0.400608	-1.31974
	nicotinamide	NA	98-92-0	706	13.3513,0	0.047861	0.117449	1.72039	0.00108802	0.407504	-1.29511
	asparagine	C4H8N2O3	70-47-3	689	13.5586,0	0.0161849	0.0304558	1.72265	0.000283779	0.531422	-0.91207
	Zymosterol	C27H44O	128-33-6	656	28.9634,0	0.00356637	0.0235696	1.41221	0.000587087	0.151313	-2.7244
	pantothenic acid	C9H17NO5	79-83-4	630	18.8873,0	0.00486273	0.000724854	1.30176	0.00595365	6.70857	2.746
	allose	NA	2595-97-3	626	15.2442,0	0.0899439	0.205707	1.85216	5.65915e-05	0.437243	-1.19349
	sulfuric acid	H2SO4	7664-93-9	603	8.99839,0	0.114905	0.179903	1.25329	0.0325488	0.638706	-0.646776
	L-Threose	NA	95-44-3	600	12.6514,0	0.00324036	0.00577681	1.31646	0.0113675	0.560926	-0.834117
	Threitol	NA	7493-90-5	567	13.4484,0	0.00154386	0.00359673	1.03176	8.47842e-05	0.429242	-1.22014
	1-Aminocyclopropanecarboxylic acid	NA	22059-21-8	566	9.58619,0	0.000722146	0.00984209	1.87479	1.32624e-08	0.0733732	-3.7686
	unknown			566	13.9703,0	0.00312631	0.00543418	1.93172	1.17113e-06	0.575305	-0.797601
	malonic acid	C3H4O4	141-82-2	538	9.41562,0	0.0500014	0.104054	2.03097	0.000183209	0.480536	-1.05728
	norvaline	NA	6600-40-4	531	10.0163,0	0.0614759	0.114791	1.52026	0.00645943	0.535546	-0.900919
	unknown			530	25.6647,0	3.58947e-06	0.00187073	1.57857	0.00468874	0.00191875	-9.02562
	4-hydroxybutyrate	NA	502-85-2	518	9.97289,0	0.0658882	0.13908	1.44565	0.000246681	0.473744	-1.07782
	palatinitol	NA	64519-82-0	495	26.3423,0	0.0184286	0.0381224	1.73107	0.000155616	0.483405	-1.04869
	cholesterol	C27H46O	57-88-5	490	28.6064,0	0.00314134	0.000223351	1.76523	0.000119852	14.0646	3.81399
	5'-methylthioadenosine	C11H15N5O3S	2457-80-9	471	25.5051,0	0.00193878	0.00060031	1.36639	0.000117722	3.22964	1.69137
	Digitoxose	NA	527-52-6	469	14.7636,0	0.00378995	0.00866752	1.95023	0.000203154	0.437258	-1.19344
	unknown			453	10.3621,0	0.0181524	0.0266224	1.35598	0.0146374	0.681846	-0.552483
	toluenesulfonic acid	C7H8O3S	104-15-4	445	15.0591,0	0.00838916	0.0208076	1.02785	0.000342737	0.403178	-1.31051
	Phenylphosphoric acid	C6H7O4P	701-64-4	437	14.7145,0	0.119621	0.191462	1.38514	0.00149092	0.624777	-0.678587
	cyclohexylsulfamic acid	C6H13NO3S	100-88-9	431	15.6249,0	0.00288205	0.00732709	1.93998	0.00096568	0.393341	-1.34615
	Neohesperidin	C28H34O15	13241-33-3	429	23.1556,0	0.0003719	0.0227443	1.53108	0.00320685	0.0163514	-5.93444
	unknown			421	23.5959,0	0.0141846	0.00136419	1.13264	0.0306186	10.3978	3.37821
	cis-gondoic acid			405	22.7133,0	0.244111	0.134115	1.3344	0.00293845	1.82017	0.864071
	unknown	NA	5561-99-9	403	8.95002,0	0.0269421	0.0432414	1.52633	0.00171617	0.623063	-0.682551
	3-Aminoisobutyric acid	C4H9NO2	144-90-1	400	12.979,0	0.0208067	0.0371629	1.7458	0.000203873	0.559879	-0.836812
	3-Cyanoalanine	NA	6232-19-5	390	11.8378,0	0.00355295	0.00647001	1.44317	0.00235004	0.549141	-0.864752
	Cholestane-3,5,6-triol	NA	1253-84-5	389	30.3035,0	0.0859822	0.162422	1.21993	0.0100373	0.529376	-0.917634
	unknown			384	14.7907,0	0.0113456	0.0313377	2.12532	2.20696e-06	0.362044	-1.46576
	6-Hydroxynicotinic acid	C6H5NO3	5006-66-6	382	14.2909,0	0.0144283	0.038958	1.90931	4.12792e-06	0.370355	-1.43302
	Atropine	C17H23NO3	51-55-8	377	21.6818,0	0.0224624	0.0136692	1.17931	0.0454751	1.64329	0.716585
	unknown			359	9.55285,0	0.0247248	0.0399861	1.39992	0.0036169	0.618335	-0.69354
	unknown			355	22.8035,0	0.0358074	0.023261	1.1126	0.0315986	1.53938	0.622346
	2-ketoadipate	NA	689-31-6	354	10.121,0	0.0125425	0.0206956	1.45538	0.000781154	0.606044	-0.722505
	DL-dihydrosphingosine	NA	13552-09-5	353	22.9169,0	0.12023	0.0826145	1.03422	0.04621	1.45531	0.541327
	4-Hydroxy-6-methyl-2-pyrone	C6H6O3	675-10-5	346	13.4166,0	0.0492469	0.0835657	1.54839	0.00107114	0.589319	-0.762879
	3-hydroxybenzaldehyde	C7H6O2	100-83-4	342	13.0947,0	0.120275	0.271725	1.81101	0.000689382	0.442636	-1.17581
	2-ketobutyric acid	C4H6O3	600-18-0	341	7.89251,0	3.58947e-06	0.00250182	1.20754	0.0426473	0.00143474	-9.44499
	unknown			341	12.2961,0	0.0237274	0.0460035	1.636	0.000417122	0.515774	-0.95519
	Allylmalonic acid	NA	2583-25-7	338	11.2907,0	0.00438698	0.00779346	1.83396	0.000363089	0.562906	-0.829035
	2-amino-3-(4-hydroxyphenyl)propanoic acid	C9H11NO3	556-03-6	338	17.648,0	3.58947e-06	0.00538207	1.46567	0.0260017	0.000666931	-10.5502
	unknown			334	8.70375,0	0.0056603	0.00825883	1.16522	0.0321232	0.685363	-0.54506
	unknown			332	27.5159,0	0.00175414	0.0118153	1.24358	0.000327602	0.148464	-2.75182
	unknown			331	12.5048,0	0.0111584	0.0192037	1.94135	8.95302e-05	0.581055	-0.783253
	unknown			328	24.2746,0	0.0122627	0.00394512	1.34124	0.00029408	3.10833	1.63614
	unknown			325	23.3672,0	0.0534911	0.0272645	1.37653	0.00466022	1.96194	0.972278
	unknown			321	9.0919,0	0.025131	0.0485636	1.47123	0.0024228	0.517487	-0.950406
	Carbobenzyloxy-L-leucine degr	NA	2018-66-8	319	10.1966,0	0.0231285	0.0386032	1.47844	0.00261397	0.599134	-0.739049
	unknown			316	24.4584,0	0.00177177	5.508e-06	1.77017	0.000245673	321.673	8.32945
	unknown			315	7.60215,0	0.0170019	0.0353821	1.19679	0.0305511	0.480522	-1.05733
	unknown			305	10.7227,0	0.0108533	0.0180872	1.33406	0.00592589	0.600051	-0.736843
	unknown			301	13.9824,0	0.0602694	0.100917	1.42183	0.00194681	0.597218	-0.74367
	2-amino-2-methylpropane-1,3-diol	C4H11NO2	115-69-5	299	11.1374,0	0.00933934	0.0175763	1.60417	0.000180097	0.531359	-0.91224
	D-erythronolactone	NA	15667-21-7	294	14.8356,0	0.000529576	0.0028131	1.32813	0.000202428	0.188253	-2.40925
	Dihydroxyacetone	C3H6O3	62147-49-3	287	10.1671,0	0.0534305	0.0899239	1.34329	0.00587428	0.594175	-0.751039
	2-Methylglutaric Acid	NA	617-62-9	278	12.4934,0	0.00661632	0.0103183	1.38411	0.00570488	0.641223	-0.641101
	unknown			277	7.98421,0	0.00623973	0.0104854	1.29768	0.0146152	0.595088	-0.748825
	Thymol	C10H14O	89-83-8	272	11.1782,0	0.00326382	0.00594082	1.7902	1.0569e-05	0.549388	-0.864103
	unknown			264	10.4595,0	0.0345823	0.00715835	1.30077	0.0211659	4.83104	2.27233
	unknown			260	8.81158,0	0.00177801	0.00412499	1.08543	3.64267e-05	0.431033	-1.21413
	unknown			257	9.83877,0	0.00240015	0.003838	1.31308	0.0117167	0.625364	-0.677233
	9-Fluorenone	C13H8O	486-25-9	255	18.6082,0	0.00511888	0.0131166	1.1585	0.00549355	0.39026	-1.35749
	unknown			250	9.20604,0	0.0014931	0.00426408	1.10717	0.000420242	0.350158	-1.51392
	unknown			248	7.95504,0	0.00984278	0.0165844	1.27693	0.0202582	0.593496	-0.752689
	1-Methylhydantoin	NA	616-04-6	248	11.2372,0	0.0536556	0.0961248	1.59333	0.000712241	0.558186	-0.841181
	Biuret	C2H5N3O2	108-19-0	240	15.9226,0	0.04173	0.0705082	1.64178	0.000244973	0.591846	-0.756707
	unknown			238	8.28865,0	0.0280377	0.0448117	1.3436	0.00447429	0.625679	-0.676505
	unknown			237	8.0727,0	0.0474294	0.0882192	1.03287	0.00979373	0.537632	-0.89531
	unknown			237	9.75891,0	0.00683054	0.0108388	1.54361	0.00525697	0.630193	-0.666135
	unknown			237	14.5329,0	0.00292347	0.00793965	1.18415	0.0136998	0.368212	-1.44139
	unknown			231	12.4377,0	0.000939552	0.00397634	1.98397	0.000475296	0.236286	-2.0814
	unknown			215	10.9067,0	0.00861747	0.0145756	1.39281	0.00514314	0.591227	-0.758217
	unknown			213	7.26159,0	3.58947e-06	0.00502042	2.1694	1.76527e-05	0.000714974	-10.4498
	unknown			212	12.3089,0	0.00438245	0.00707073	1.58765	0.00546974	0.619802	-0.69012
	unknown			209	9.01568,0	0.0022685	0.00566659	1.06313	0.00062763	0.400329	-1.32074
	unknown			208	14.0164,0	0.0100789	0.0173125	1.50341	0.00127335	0.582174	-0.780477
	glutaraldehyde	C5H8O2	111-30-8	207	8.83361,0	0.0244313	0.0436566	1.78558	0.00132911	0.559625	-0.837467
	unknown			205	20.541,0	0.00168994	0.000612525	1.3432	0.0323349	2.75897	1.46413
	3-Hydroxypalmitic acid	NA	928-17-6	201	20.9903,0	0.00777597	0.00487393	1.16793	0.0424347	1.59542	0.673936
	unknown			195	11.4812,0	0.0196657	0.0321756	1.44007	0.0036439	0.6112	-0.710284
	unknown			190	15.6018,0	0.00965764	0.0181754	1.84316	5.01076e-06	0.531359	-0.912242
	unknown			187	9.77007,0	0.00229276	0.00338668	1.2487	0.0123583	0.676993	-0.562787
	unknown			87	18.0672,0	3.58947e-06	0.00365798	1.55806	0.0123785	0.000981272	-9.99306
	unknown			80	7.2157,0	0.00436028	0.00762718	1.42989	0.0170372	0.571676	-0.80673
	unknown			0	6.7893,0	0.0085879	0.0136124	1.32506	0.00420629	0.63089	-0.66454
	unknown			0	6.82701,0	0.0240058	0.0679488	2.07054	2.43586e-07	0.353292	-1.50107
	unknown			0	6.87894,0	0.011354	0.0285685	1.939	7.12869e-05	0.397431	-1.33122
	unknown			0	7.24884,0	0.00401972	0.00889212	1.86918	4.98277e-06	0.452054	-1.14543
	unknown			0	7.7692,0	0.0199981	0.034046	1.15412	0.0355854	0.587385	-0.767622
	unknown			0	7.82954,0	0.0127322	0.0209255	1.16797	0.0215328	0.608452	-0.716784
	unknown			0	8.2652,0	0.132616	0.200003	1.11981	0.0389955	0.663071	-0.592765
	unknown			0	8.50219,0	0.0840524	0.152145	1.40874	0.00480475	0.552448	-0.85609
	unknown			0	9.27043,0	0.0194757	0.0424739	1.99143	7.62841e-08	0.458532	-1.1249
	unknown			0	13.5499,0	0.0150341	0.0335214	2.01223	2.51051e-07	0.448494	-1.15684
	unknown			0	34.7445,0	0.000510656	0.0116479	1.5284	0.00643145	0.043841	-4.51158
